# Supplementary material for: Auditing HIV Testing Rates across Europe: Results from the HIDES 2 Study
Source: PubMed Central journal article supplement (PMC4641587; doi:10.1371/journal.pone.0140845), 2015-11-11
Supplement: pone.0140845.s001.pdf [file pone.0140845.s001.pdf]

## Auditing HIV Testing Rates across Europe

| Centercode | what_indicatordisease* | not_known_hiv_pos | not_known_hiv_pos_datefrom | not_known_hiv_pos_dateto | number_offered_hivtest | number_hiv_tested | number_hiv_positive | completed_date |  |
|------------|------------------------|-------------------|----------------------------|--------------------------|------------------------|-------------------|---------------------|----------------|--|
| 4512       | 1                      | 47                | 2011-01-01                 | 2012-12-31               | 36                     | 34                | 0                   | 2013-05-10     |  |
| 4512       | 1                      | 30                | 2009-01-01                 | 2010-12-31               | 30                     | 30                | 1                   | 2013-05-10     |  |
| 4512       | 1                      | 40                | 2007-01-01                 | 2008-12-31               | 39                     | 39                | 1                   | 2013-05-10     |  |
| 1000       | 1                      | 126               | 2010-01-01                 | 2011-12-31               | 115                    | 115               | 5                   | 2012-04-18     |  |
| 1000       | 2                      | 22                | 2010-01-01                 | 2011-12-31               | 19                     | 19                | 3                   | 2012-04-18     |  |
| 1000       | 4                      | 30                | 2010-01-01                 | 2011-12-31               | 9                      | 9                 | 0                   | 2012-09-21     |  |
| 1515       | 6                      | 3                 | 2012-01-01                 | 2012-12-31               | 1                      | 1                 | 1                   | 2013-05-16     |  |
| 2000       | 1                      | 191               | 2007-08-01                 | 2011-12-22               | 134                    | 130               | 0                   | 2013-05-07     |  |
| 2000       | 2                      | 92                | 2008-07-30                 | 2013-01-25               | 64                     | 63                | 10                  | 2013-05-07     |  |
| 2000       | 3                      | 23                | 2001-01-01                 | 2011-10-30               | 5                      | 5                 | 0                   | 2013-05-07     |  |
| 2000       | 4                      | 43                | 2007-04-02                 | 2011-10-30               | 2                      | 2                 | 0                   | 2013-05-07     |  |
| 2000       | 5                      | 200               | 2010-11-02                 | 2012-02-16               | 138                    | 135               | 1                   | 2013-05-07     |  |
| 2003       | 2                      | 281               | 2009-01-01                 | 2009-12-31               |                        | 91                | 3                   | 2013-04-15     |  |
| 2003       | 5                      | 297               | 2012-01-02                 | 2012-12-31               | 297                    | 297               | 0                   | 2013-04-16     |  |
|            | 5                      | 185               | 2013-01-01                 | 2013-03-30               | 100                    | 100               | 3                   | 2013-09-23     |  |
| 2019       | 3                      | 167               | 1998-07-09                 | 2012-10-25               |                        | 2                 | 0                   | 2013-04-24     |  |
| 2019       | 6                      | 524               | 1997-11-13                 | 2012-10-02               |                        | 90                | 8                   | 2013-04-24     |  |
| 2023       | 1                      | 188               | 2011-01-10                 | 2012-09-18               | 162                    | 161               | 8                   | 2013-05-13     |  |
| 2031       | 1                      | 121               | 2010-01-04                 | 2012-08-01               | 41                     | 40                | 0                   | 2012-12-18     |  |
| 2519       | 1                      | 12                | 2012-01-01                 | 2012-12-31               | 11                     | 11                | 0                   | 2013-05-10     |  |
| 2519       | 2                      | 1                 | 2012-01-01                 | 2012-12-31               | 1                      | 1                 | 1                   | 2013-05-10     |  |
| 2519       | 5                      | 23                | 2012-01-01                 | 2012-12-31               | 20                     | 20                | 0                   | 2013-05-10     |  |
| 2522       | 1                      | 29                | 2012-01-01                 | 2012-12-31               | 21                     | 21                | 1                   | 2013-05-21     |  |
| 2522       | 2                      | 58                | 2012-01-01                 | 2012-12-31               | 45                     | 45                | 0                   | 2013-06-04     |  |
| 2522       | 5                      | 59                | 2012-01-01                 | 2012-12-31               | 35                     | 35                | 0                   | 2013-05-21     |  |
| 4509       | 1                      | 50                | 2010-12-31                 | 2012-06-30               | 43                     | 43                | 2                   | 2013-05-15     |  |
|            | 1                      | 62                | 2012-01-01                 | 2012-12-31               | 62                     | 62                | 4                   | 2013-05-03     |  |
| 6514       | 1                      | 38                | 2011-01-01                 | 2011-12-31               | 26                     | 26                | 2                   | 2012-10-19     |  |
| 6514       | 2                      | 78                | 2011-01-01                 | 2011-12-31               | 73                     | 2                 | 1                   | 2013-03-13     |  |
| 6514       | 3                      | 4                 | 2011-01-01                 | 2011-12-31               | 0                      | 0                 | 0                   | 2012-10-19     |  |
| 6514       | 4                      | 24                | 2011-01-01                 | 2011-12-31               | 5                      | 5                 | 0                   | 2013-03-06     |  |
| 7001       | 2                      | 419               | 2010-01-01                 | 2012-10-25               | 109                    | 109               | 1                   | 2012-10-25     |  |
| 7001       | 5                      | 395               | 2010-01-01                 | 2012-10-25               | 237                    | 234               | 2                   | 2012-10-25     |  |
| 8000       | 1                      | 143               | 2009-01-02                 | 2009-12-23               | 100                    | 100               | 0                   | 2012-10-08     |  |
| 9002       | 3                      | 18                | 2010-01-01                 | 2013-05-01               |                        | 5                 | 0                   | 2013-05-19     |  |
| 9002       | 4                      | 40                | 2010-12-31                 | 2013-05-01               |                        | 5                 | 0                   | 2013-05-13     |  |
| 9100       | 5                      | 419               | 2011-01-01                 | 2011-12-31               | 408                    | 405               | 3                   | 2013-04-22     |  |
| 9101       | 3                      | 319               | 2011-01-01                 | 2011-12-31               | 267                    | 267               | 0                   | 2013-04-29     |  |
| 9101       | 4                      | 343               | 2011-01-01                 | 2011-12-31               | 321                    | 320               | 1                   | 2013-04-29     |  |
| 9101       | 5                      | 412               | 2011-01-01                 | 2011-12-31               |                        | 408               | 3                   | 2012-11-17     |  |
| 9501       | 1                      | 114               | 2011-01-01                 | 2012-12-31               |                        | 19                | 1                   | 2013-04-23     |  |
| 9805       | 2                      | 128               | 2012-01-01                 | 2012-12-31               |                        | 80                | 0                   | 2013-05-04     |  |
| 9806       | 2                      | 195               | 2009-12-01                 | 2012-09-14               | 195                    | 167               | 2                   | 2012-09-14     |  |
| 9806       | 5                      | 587               | 2009-12-01                 | 2012-09-02               | 587                    | 587               | 9                   | 2012-09-02     |  |
| 9806       | 6                      | 40                | 2010-12-31                 | 2012-07-01               | 40                     | 40                | 13                  | 2013-04-19     |  |
| 9810       | 4                      | 103               | 2011-09-23                 | 2010-01-22               | 103                    | 103               | 0                   | 2012-08-27     |  |
| 9810       | 1                      | 100               | 2009-09-23                 | 2009-10-28               | 100                    | 100               | 2                   | 2012-08-01     |  |
| 9810       | 1                      | 110               | 2011-01-28                 | 2011-12-28               | 110                    | 110               | 19                  | 2012-08-03     |  |
| 9810       | 5                      | 104               | 2010-01-27                 | 2011-09-30               | 104                    | 104               | 2                   | 2012-08-27     |  |

- \* Indicatordisease
- 1 A) Tuberculosis
  - 2 B) Non-Hodgkin's lymphoma
  - 3 C) Anal cancer
  - 4 D) Cervical cancer
  - 5 E) Hepatitis B and C
  - 6 F) Candida esophagitis
